# Supplementary material
Source: Springer Nature journal article supplement (https://www.springermedizin.de/resource/supplementary/13075_2013_4176_MOESM8_ESM.pdf/9696268)
Supplement: MOESM8 [file 9696268]

| GS/<br>PD | No | R/L | Finger |   |   |   |   | Wrist  |   |   | Shoulder |   |   | Ankle    |   |   |          | Toe |        |    |         |    | Total |         |    |   |   |   |   |   |   |   |   |   |   |    |    |    |    |
|-----------|----|-----|--------|---|---|---|---|--------|---|---|----------|---|---|----------|---|---|----------|-----|--------|----|---------|----|-------|---------|----|---|---|---|---|---|---|---|---|---|---|----|----|----|----|
|           |    |     | Palmer |   |   |   |   | Dorsal |   |   | Palmer   |   |   | Anterior |   |   | Extensor |     | Medial |    | Lateral |    |       | Plantar |    |   |   |   |   |   |   |   |   |   |   |    |    |    |    |
|           |    |     | FD     |   |   |   |   | Comp   |   |   | ET       |   |   | LHB      |   |   | EDL      | EHL | TA     | TP | FDL     | PL |       | PB      | FD |   |   |   |   |   |   |   |   |   |   |    |    |    |    |
|           |    |     | 1      | 2 | 3 | 4 | 5 | 2      | 4 | 6 | ET       |   |   | LHB      |   |   | EDL      | EHL | TA     | TP | FDL     | PL |       | PB      | 1  | 2 | 3 | 4 | 5 |   |   |   |   |   |   |    |    |    |    |
| GS        | 1  | R   | 0      | 1 | 1 | 1 | 1 | 1      | 1 | 1 | 0        | 0 | 1 | 0        | 0 | 0 | 0        | 0   | 0      | 0  | 0       | 0  | 0     | 0       | 0  | 0 | 0 | 0 | 0 | 0 | 0 | 0 | 0 | 0 | 0 | 17 |    |    |    |
|           |    | L   | 1      | 1 | 1 | 1 | 1 | 1      | 1 | 1 | 0        | 0 | 1 | 0        | 0 | 0 | 0        | 0   | 0      | 0  | 0       | 0  | 0     | 0       | 0  | 0 | 0 | 0 | 0 | 0 | 0 | 0 | 0 | 0 | 0 | 0  | 0  | 0  | 17 |
|           | 2  | R   | 2      | 2 | 2 | 2 | 1 | 1      | 2 | 1 | 0        | 0 | 2 | 1        | 3 | 0 | 0        | 0   | 1      | 1  | 1       | 1  | 0     | 0       | 0  | 0 | 0 | 0 | 0 | 0 | 0 | 0 | 0 | 0 | 0 | 0  | 0  | 0  | 38 |
|           |    | L   | 0      | 2 | 2 | 2 | 1 | 1      | 1 | 0 | 0        | 0 | 2 | 2        | 2 | 1 | 0        | 0   | 2      | 1  | 0       | 2  | 1     | 0       | 0  | 0 | 0 | 0 | 0 | 0 | 0 | 0 | 0 | 0 | 0 | 0  | 0  | 0  | 38 |
|           | 3  | R   | 0      | 0 | 0 | 0 | 0 | 0      | 0 | 0 | 0        | 0 | 1 | 1        | 0 | 0 | 0        | 0   | 0      | 0  | 0       | 0  | 0     | 0       | 0  | 0 | 0 | 0 | 0 | 0 | 0 | 0 | 0 | 0 | 0 | 0  | 0  | 4  |    |
|           |    | L   | 0      | 1 | 1 | 0 | 0 | 0      | 0 | 0 | 0        | 0 | 1 | 1        | 0 | 0 | 0        | 0   | 0      | 0  | 0       | 0  | 0     | 0       | 0  | 0 | 0 | 0 | 0 | 0 | 0 | 0 | 0 | 0 | 0 | 0  | 0  | 0  | 4  |
|           | 4  | R   | 0      | 2 | 1 | 2 | 3 | 1      | 2 | 1 | 0        | 0 | 1 | 3        | 0 | 1 | 1        | 0   | 1      | 1  | 0       | 1  | 1     | 0       | 0  | 0 | 0 | 0 | 0 | 0 | 0 | 0 | 0 | 0 | 0 | 0  | 0  | 0  | 38 |
|           |    | L   | 1      | 2 | 2 | 1 | 2 | 0      | 1 | 1 | 0        | 0 | 2 | 2        | 3 | 0 | 1        | 0   | 0      | 0  | 0       | 0  | 0     | 0       | 0  | 0 | 0 | 0 | 0 | 0 | 0 | 0 | 0 | 0 | 0 | 0  | 0  | 0  | 38 |
|           | 5* | R   | 3      | 2 | 3 | 3 | 1 | 2      | 1 | 2 | 1        | 1 | 0 | 3        | 2 | 3 | 2        | 2   | 2      | 2  | 2       | 2  | 2     | 2       | 2  | 2 | 2 | 2 | 2 | 2 | 2 | 2 | 2 | 2 | 2 | 2  | 2  | 2  | 79 |
|           |    | L   | 3      | 2 | 2 | 2 | 1 | 3      | 2 | 2 | 1        | 1 | 0 | 3        | 2 | 3 | 2        | 1   | 2      | 1  | 3       | 3  | 3     | 3       | 3  | 3 | 3 | 3 | 3 | 3 | 3 | 3 | 3 | 3 | 3 | 3  | 3  | 3  | 79 |
| 5**       | R  | 0   | 1      | 1 | 1 | 1 | 1 | 0      | 1 | 0 | 0        | 0 | 2 | 0        | 2 | 1 | 1        | 1   | 1      | 1  | 1       | 1  | 0     | 0       | 0  | 0 | 0 | 0 | 0 | 0 | 0 | 0 | 0 | 0 | 0 | 0  | 0  | 19 |    |
|           | L  | 0   | 0      | 1 | 1 | 0 | 0 | 0      | 0 | 0 | 0        | 0 | 1 | 0        | 1 | 0 | 0        | 0   | 0      | 1  | 0       | 1  | 0     | 0       | 0  | 0 | 0 | 0 | 0 | 0 | 0 | 0 | 0 | 0 | 0 | 0  | 0  | 19 |    |
| 6*        | R  | 0   | 1      | 1 | 1 | 1 | 2 | 2      | 1 | 0 | 0        | 1 | 2 | 0        | 1 | 1 | 1        | 1   | 1      | 1  | 1       | 1  | 1     | 1       | 1  | 1 | 1 | 1 | 1 | 1 | 1 | 1 | 1 | 1 | 1 | 1  | 1  | 44 |    |
|           | L  | 0   | 1      | 2 | 2 | 1 | 1 | 1      | 2 | 0 | 0        | 1 | 2 | 0        | 1 | 1 | 0        | 1   | 1      | 0  | 1       | 1  | 0     | 0       | 0  | 0 | 0 | 0 | 0 | 0 | 0 | 0 | 0 | 0 | 0 | 0  | 0  | 44 |    |
| 6**       | R  | 0   | 0      | 0 | 0 | 0 | 1 | 0      | 0 | 0 | 0        | 0 | 0 | 0        | 0 | 0 | 0        | 1   | 0      | 0  | 0       | 0  | 0     | 0       | 0  | 0 | 0 | 0 | 0 | 0 | 0 | 0 | 0 | 0 | 0 | 0  | 0  | 6  |    |
|           | L  | 0   | 0      | 0 | 0 | 0 | 1 | 0      | 1 | 0 | 0        | 0 | 1 | 0        | 0 | 0 | 0        | 1   | 0      | 0  | 0       | 0  | 0     | 0       | 0  | 0 | 0 | 0 | 0 | 0 | 0 | 0 | 0 | 0 | 0 | 0  | 0  | 6  |    |
| 7         | R  | 0   | 0      | 0 | 0 | 0 | 3 | 1      | 0 | 0 | 0        | 0 | 2 | 1        | 2 | 2 | 2        | 2   | 2      | 2  | 2       | 2  | 2     | 2       | 2  | 2 | 2 | 2 | 2 | 2 | 2 | 2 | 2 | 2 | 2 | 2  | 2  | 25 |    |
|           | L  | 0   | 0      | 0 | 0 | 0 | 1 | 2      | 1 | 0 | 0        | 0 | 0 | 1        | 0 | 2 | 1        | 0   | 2      | 1  | 1       | 1  | 1     | 1       | 1  | 1 | 1 | 1 | 1 | 1 | 1 | 1 | 1 | 1 | 1 | 1  | 1  | 25 |    |
| 8         | R  | 1   | 1      | 2 | 2 | 2 | 2 | 2      | 1 | 0 | 0        | 0 | 2 | 0        | 2 | 2 | 2        | 2   | 2      | 2  | 2       | 2  | 2     | 2       | 2  | 2 | 2 | 2 | 2 | 2 | 2 | 2 | 2 | 2 | 2 | 2  | 2  | 51 |    |
|           | L  | 1   | 1      | 1 | 1 | 1 | 3 | 2      | 2 | 0 | 0        | 1 | 2 | 1        | 3 | 2 | 1        | 3   | 2      | 1  | 2       | 1  | 2     | 1       | 2  | 1 | 2 | 1 | 2 | 1 | 2 | 1 | 2 | 1 | 2 | 1  | 2  | 51 |    |
| 9         | R  | 0   | 0      | 0 | 0 | 0 | 1 | 0      | 1 | 0 | 0        | 0 | 0 | 0        | 0 | 0 | 0        | 0   | 0      | 0  | 0       | 0  | 0     | 0       | 0  | 0 | 0 | 0 | 0 | 0 | 0 | 0 | 0 | 0 | 0 | 0  | 0  | 8  |    |
|           | L  | 0   | 0      | 1 | 0 | 0 | 1 | 0      | 1 | 0 | 0        | 0 | 1 | 0        | 0 | 1 | 0        | 0   | 1      | 0  | 0       | 0  | 0     | 0       | 0  | 0 | 0 | 0 | 0 | 0 | 0 | 0 | 0 | 0 | 0 | 0  | 0  | 8  |    |
| 10        | R  | 0   | 0      | 0 | 0 | 0 | 1 | 0      | 0 | 0 | 0        | 0 | 2 | 0        | 0 | 1 | 1        | 1   | 1      | 1  | 2       | 1  | 2     | 1       | 2  | 1 | 2 | 1 | 2 | 1 | 2 | 1 | 2 | 1 | 2 | 1  | 11 |    |    |
|           | L  | 0   | 0      | 0 | 0 | 0 | 0 | 0      | 0 | 0 | 0        | 0 | 1 | 0        | 0 | 0 | 0        | 0   | 0      | 0  | 1       | 1  | 0     | 0       | 0  | 0 | 0 | 0 | 0 | 0 | 0 | 0 | 0 | 0 | 0 | 0  | 0  | 11 |    |
| PD        | 1  | R   | 0      | 0 | 0 | 0 | 0 | 0      | 0 | 0 | 0        | 0 | 0 | 0        | 0 | 0 | 0        | 0   | 0      | 0  | 0       | 0  | 0     | 0       | 0  | 0 | 0 | 0 | 0 | 0 | 0 | 0 | 0 | 0 | 0 | 0  | 0  | 0  |    |
|           |    | L   | 0      | 0 | 0 | 0 | 0 | 0      | 0 | 0 | 0        | 0 | 0 | 0        | 0 | 0 | 0        | 0   | 0      | 0  | 0       | 0  | 0     | 0       | 0  | 0 | 0 | 0 | 0 | 0 | 0 | 0 | 0 | 0 | 0 | 0  | 0  | 0  | 0  |
|           | 2  | R   | 1      | 2 | 1 | 1 | 0 | 0      | 2 | 2 | 0        | 0 | 0 | 1        | 0 | 2 | 0        | 0   | 0      | 0  | 0       | 0  | 0     | 0       | 0  | 0 | 0 | 0 | 0 | 0 | 0 | 0 | 0 | 0 | 0 | 0  | 0  | 0  | 12 |
|           |    | L   | 0      | 2 | 1 | 1 | 0 | 0      | 0 | 0 | 0        | 0 | 0 | 1        | 2 | 2 | 0        | 0   | 0      | 0  | 0       | 0  | 0     | 0       | 0  | 0 | 0 | 0 | 0 | 0 | 0 | 0 | 0 | 0 | 0 | 0  | 0  | 0  | 12 |
|           | 3  | R   | 0      | 0 | 0 | 0 | 0 | 0      | 0 | 0 | 0        | 0 | 0 | 0        | 0 | 0 | 0        | 0   | 0      | 0  | 0       | 0  | 0     | 0       | 0  | 0 | 0 | 0 | 0 | 0 | 0 | 0 | 0 | 0 | 0 | 0  | 0  | 0  | 0  |
|           |    | L   | 0      | 0 | 0 | 0 | 0 | 0      | 0 | 0 | 0        | 0 | 0 | 0        | 0 | 0 | 0        | 0   | 0      | 0  | 0       | 0  | 0     | 0       | 0  | 0 | 0 | 0 | 0 | 0 | 0 | 0 | 0 | 0 | 0 | 0  | 0  | 0  | 0  |
|           | 4  | R   | 0      | 0 | 0 | 1 | 0 | 0      | 1 | 0 | 0        | 0 | 0 | 0        | 0 | 0 | 0        | 0   | 0      | 0  | 0       | 0  | 0     | 0       | 0  | 0 | 0 | 0 | 0 | 0 | 0 | 0 | 0 | 0 | 0 | 0  | 0  | 0  | 4  |
|           |    | L   | 0      | 0 | 0 | 0 | 0 | 0      | 0 | 0 | 0        | 0 | 1 | 0        | 1 | 0 | 0        | 0   | 0      | 0  | 0       | 0  | 0     | 0       | 0  | 0 | 0 | 0 | 0 | 0 | 0 | 0 | 0 | 0 | 0 | 0  | 0  | 0  | 4  |
|           | 5* | R   | 3      | 2 | 3 | 3 | 1 | 2      | 2 | 2 | 1        | 2 | 0 | 3        | 1 | 3 | 2        | 2   | 2      | 2  | 2       | 2  | 2     | 2       | 2  | 2 | 2 | 2 | 2 | 2 | 2 | 2 | 2 | 2 | 2 | 2  | 2  | 2  | 72 |
|           |    | L   | 3      | 3 | 3 | 2 | 1 | 3      | 1 | 1 | 2        | 0 | 0 | 3        | 1 | 3 | 2        | 1   | 3      | 2  | 1       | 2  | 2     | 1       | 2  | 2 | 1 | 2 | 2 | 1 | 2 | 2 | 1 | 2 | 2 | 1  | 2  | 2  | 72 |
| 5**       | R  | 0   | 0      | 0 | 0 | 0 | 1 | 0      | 1 | 0 | 0        | 0 | 2 | 0        | 0 | 0 | 0        | 1   | 1      | 0  | 0       | 0  | 0     | 0       | 0  | 0 | 0 | 0 | 0 | 0 | 0 | 0 | 0 | 0 | 0 | 0  | 0  | 8  |    |
|           | L  | 0   | 0      | 0 | 0 | 0 | 0 | 0      | 0 | 0 | 0        | 0 | 0 | 0        | 0 | 0 | 0        | 0   | 0      | 0  | 0       | 0  | 0     | 0       | 0  | 0 | 0 | 0 | 0 | 0 | 0 | 0 | 0 | 0 | 0 | 0  | 0  | 8  |    |
| 6*        | R  | 0   | 2      | 1 | 1 | 0 | 3 | 1      | 2 | 0 | 0        | 1 | 2 | 0        | 0 | 0 | 0        | 0   | 0      | 0  | 0       | 0  | 0     | 0       | 0  | 0 | 0 | 0 | 0 | 0 | 0 | 0 | 0 | 0 | 0 | 0  | 0  | 24 |    |
|           | L  | 0   | 1      | 0 | 1 | 0 | 1 | 1      | 2 | 0 | 0        | 1 | 2 | 0        | 0 | 0 | 0        | 0   | 0      | 0  | 0       | 0  | 0     | 0       | 0  | 0 | 0 | 0 | 0 | 0 | 0 | 0 | 0 | 0 | 0 | 0  | 0  | 24 |    |
| 6**       | R  | 0   | 0      | 0 | 0 | 0 | 0 | 0      | 0 | 0 | 0        | 0 | 0 | 0        | 0 | 0 | 0        | 0   | 0      | 0  | 0       | 0  | 0     | 0       | 0  | 0 | 0 | 0 | 0 | 0 | 0 | 0 | 0 | 0 | 0 | 0  | 0  | 0  |    |
|           | L  | 0   | 0      | 0 | 0 | 0 | 0 | 0      | 0 | 0 | 0        | 0 | 0 | 0        | 0 | 0 | 0        | 0   | 0      | 0  | 0       | 0  | 0     | 0       | 0  | 0 | 0 | 0 | 0 | 0 | 0 | 0 | 0 | 0 | 0 | 0  | 0  | 0  |    |
| 7         | R  | 0   | 0      | 0 | 0 | 0 | 3 | 2      | 0 | 0 | 0        | 0 | 2 | 1        | 1 | 2 | 2        | 2   | 2      | 2  | 2       | 2  | 2     | 2       | 2  | 2 | 2 | 2 | 2 | 2 | 2 | 2 | 2 | 2 | 2 | 2  | 2  | 23 |    |
|           | L  | 0   | 0      | 0 | 0 | 0 | 2 | 3      | 0 | 0 | 0        | 0 | 0 | 1        | 0 | 2 | 0        | 0   | 0      | 0  | 0       | 0  | 0     | 0       | 0  | 0 | 0 | 0 | 0 | 0 | 0 | 0 | 0 | 0 | 0 | 0  | 0  | 23 |    |
| 8         | R  | 0   | 2      | 2 | 2 | 2 | 2 | 3      | 0 | 0 | 0        | 0 | 1 | 0        | 1 | 0 | 0        | 0   | 0      | 0  | 0       | 0  | 0     | 0       | 0  | 0 | 0 | 0 | 0 | 0 | 0 | 0 | 0 | 0 | 0 | 0  | 0  | 34 |    |
|           | L  | 0   | 1      | 1 | 1 | 1 | 3 | 2      | 3 | 0 | 0        | 0 | 1 | 1        | 1 | 1 | 1        | 1   | 1      | 1  | 1       | 1  | 1     | 1       | 1  | 1 | 1 | 1 | 1 | 1 | 1 | 1 | 1 | 1 | 1 | 1  | 1  | 34 |    |
| 9         | R  | 0   | 0      | 0 | 0 | 0 | 0 | 0      | 0 | 0 | 0        | 0 | 0 | 0        | 0 | 0 | 0        | 0   | 0      | 0  | 0       | 0  | 0     | 0       | 0  | 0 | 0 | 0 | 0 | 0 | 0 | 0 | 0 | 0 | 0 | 0  | 0  | 1  |    |
|           | L  | 0   | 0      | 1 | 0 | 0 | 0 | 0      | 0 | 0 | 0        | 0 | 0 | 0        | 0 | 0 | 0        | 0   | 0      | 0  | 0       | 0  | 0     | 0       | 0  | 0 | 0 | 0 | 0 | 0 | 0 | 0 | 0 | 0 | 0 | 0  | 0  | 1  |    |
| 10        | R  | 0   | 0      | 0 | 0 | 0 | 0 | 0      | 0 | 0 | 0        | 0 | 0 | 0        | 0 | 0 | 0        | 0   | 0      | 0  | 0       | 0  | 0     | 0       | 0  | 0 | 0 | 0 | 0 | 0 | 0 | 0 | 0 | 0 | 0 | 0  | 0  | 1  |    |
|           | L  | 0   | 0      | 0 | 0 | 0 | 0 | 0      | 0 | 0 | 0        | 0 | 0 | 0        | 0 | 0 | 0        | 0   | 0      | 0  | 0       | 0  | 0     | 0       | 0  | 0 | 0 | 0 | 0 | 0 | 0 | 0 | 0 | 0 | 0 | 0  | 0  | 1  |    |

Grade 0
  Grade 1
